# Supplementary material for: Endogenous MOV10 inhibits the retrotransposition of endogenous retroelements but not the replication of exogenous retroviruses
Source: PubMed Central journal article supplement (PMC3408377; doi:10.1186/1742-4690-9-53), 2012-06-22

**A**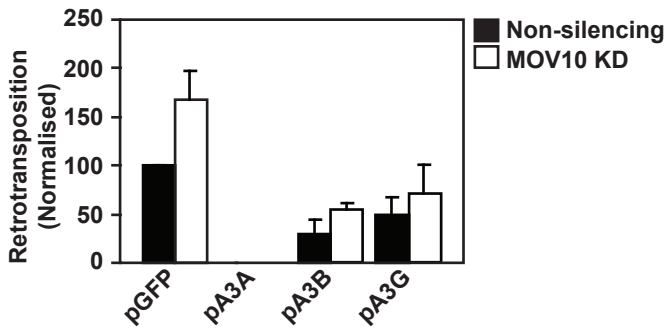**B**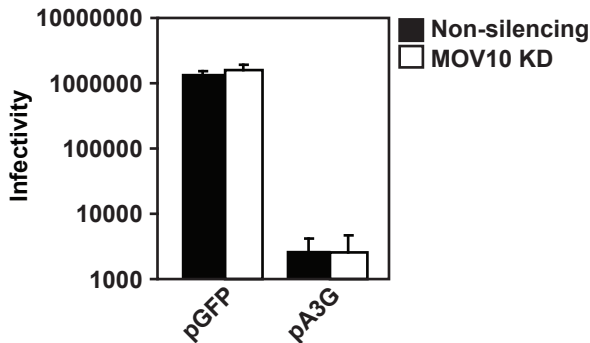

Supplement: 1742-4690-9-53-S3.pdf [file 1742-4690-9-53-S3.pdf]
